# Supplementary material for: Nanostructure and cytotoxicity of self-assembled monoolein–capric acid lyotropic liquid crystalline nanoparticles
Source: Royal Society of Chemistry journal article supplement (doi:10.1039/c5ra02604k), 2015-01-01
Supplement: c5ra02604k1.pdf [file c5ra02604k1.pdf]

## Supplementary Information

### Nanostructure and Cytotoxicity of Self-Assembled Monoolein-Capric Acid Lyotropic Liquid Crystalline Nanoparticles

Nhiem Tran, Xavier Mulet\*, Adrian M. Hawley, Tracey M. Hinton, Stephen T. Mudie, Benjamin W. Muir, Emma C. Giakoumatos, Lynne J. Waddington, Nigel M. Kirby, and Calum J. Drummond\*

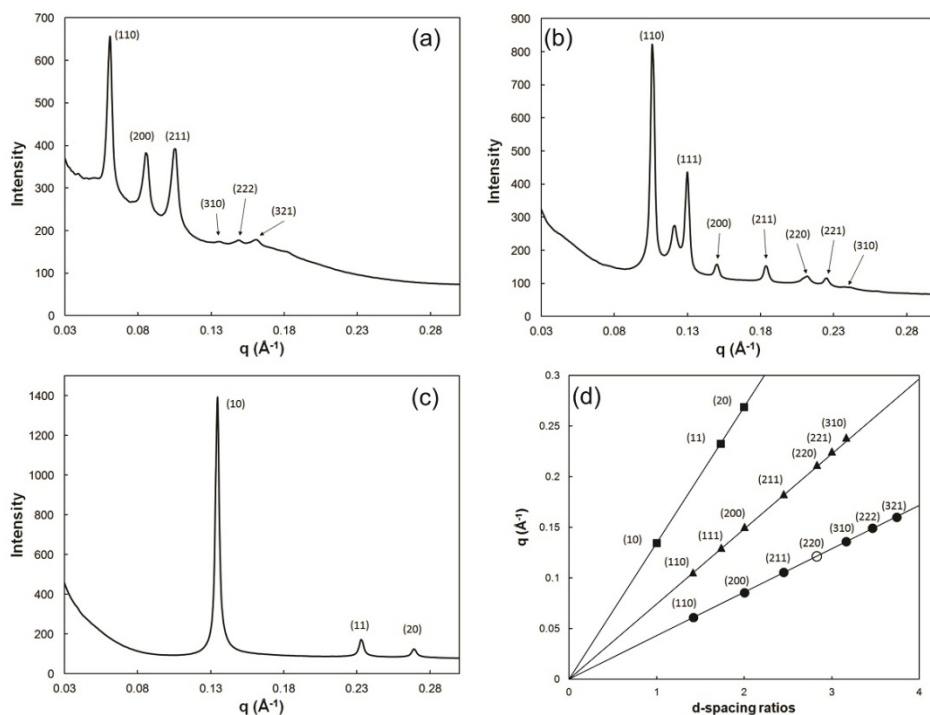

Figure S1. SAXS profiles of MO/CA dispersions NT-02 (a), NT-04 (b), and NT-05 (c) at 25°C. The peaks are indexed using standard reflections of the primitive cubic phase ( $\text{Im}\bar{3}\text{m}$ ), double diamond cubic phase ( $\text{Pn}\bar{3}\text{m}$ ), and  $\text{H}_{\text{II}}$  phase respectively. The unidentified peak in NT-04 (b) could belong to a  $\text{H}_{\text{II}}$  phase. Indexing of the SAXS data of NT-02 (●), NT-04 (▲), and NT-05 (■) samples (d). The open symbol (○) show reflection which, although allowed by the space group, was not clearly observed. For the cubic phase,  $q(hkl)$  was plotted against  $(h^2+k^2+l^2)^{1/2}$  and for the hexagonal phase  $q(hk)$  was plotted against  $(h^2+k^2+hk)^{1/2}$ , where  $h$ ,  $k$ , and  $l$  are Millers indices.

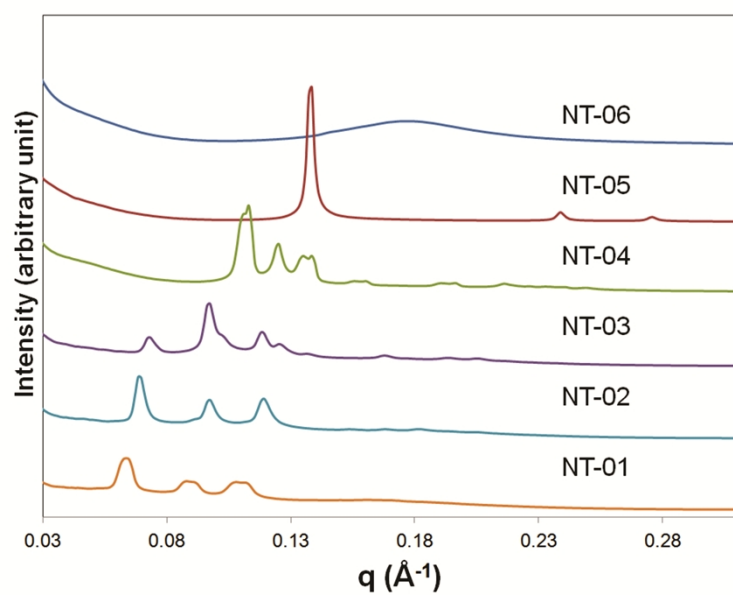

Figure S2. 1D scattering profiles of the samples at 37°C collected by synchrotron SAXS.

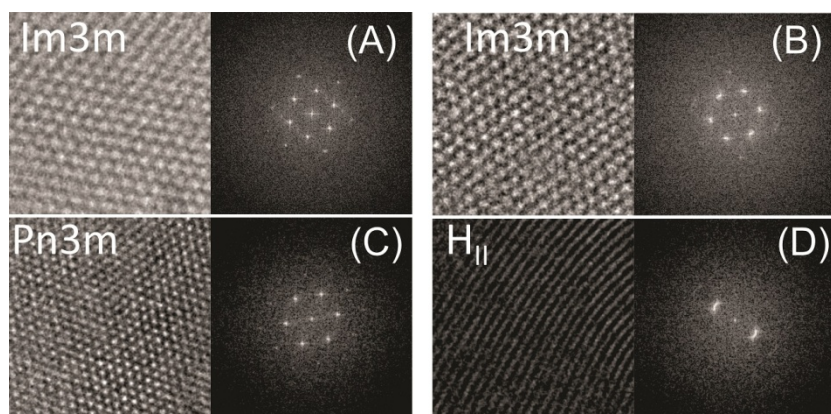

Figure S3. Cryo-TEM images of cubic and hexagonal phase nanoparticles with Fast Fourier Transformation of the particles. Cubic phase particles are viewed from the [111] direction in samples NT-01 (A), NT-02 (B), and NT-04 (C). Typical patterns of the hexagonal phase nanoparticles in sample NT-05 is also visible (D).

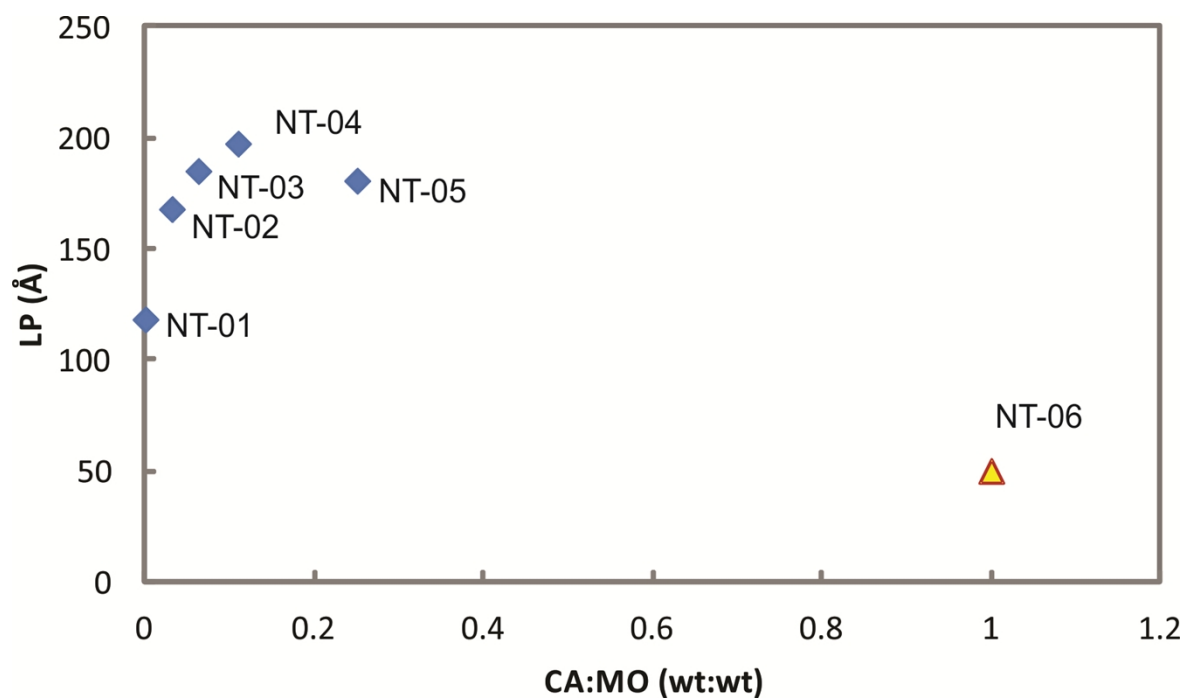

Figure S4. Lattice parameters of self-assembled nanoparticles in cell media at 25°C. Particles with cubic phase  $Q_{II}^P$  (♦) and hexagonal phase  $H_{II}$  (▲) were observed.

Table S1. Lattice parameters of lipid nanoparticles at 37°C

|                        | NT-01      | NT-02      | NT-03                 | NT-04                          | NT-05    | NT-06           |
|------------------------|------------|------------|-----------------------|--------------------------------|----------|-----------------|
| Phase                  | $Q_{II}^P$ | $Q_{II}^P$ | $Q_{II}^P / Q_{II}^D$ | $Q_{II}^D / Q_{II}^D / H_{II}$ | $H_{II}$ | EME             |
| Space group            | Im3m       | Im3m       | Im3m/Pn3m             | Pn3m/Pn3m/ $H_{II}^{\#}$       | $H_{II}$ | $L_2$           |
| Lattice parameter* (Å) | 141        | 130        | 123/91                | 81/80/59                       | 53       | 36 <sup>§</sup> |

<sup>#</sup>Two Pn3m phases were detected in sample NT-04. These two phases have very close lattice parameters.

<sup>§</sup>This value is the characteristic distance of the non-ordered  $L_2$  phase.
